# Supplementary material
Source: PubMed Central journal article supplement (PMC4898318)
Supplement: supp_WNL.0000000000002741_Supplemental_data.pdf [file supp_WNL.0000000000002741_Supplemental_data.pdf]

## Supplementary figures

Figure e-1: Overlap of lesion-network maps for 30 lesions causing asterixis.

Maximal network overlap was 22/30 and included sites in the left thalamus, MNI coordinates  $x=-12, y=-6, z=8$  (VA nucleus) and  $x=-10, y=-18, z=2$  (CM nucleus) and right thalamus, MNI coordinates:  $x=10, y=-18, z=2$  (CM nucleus).

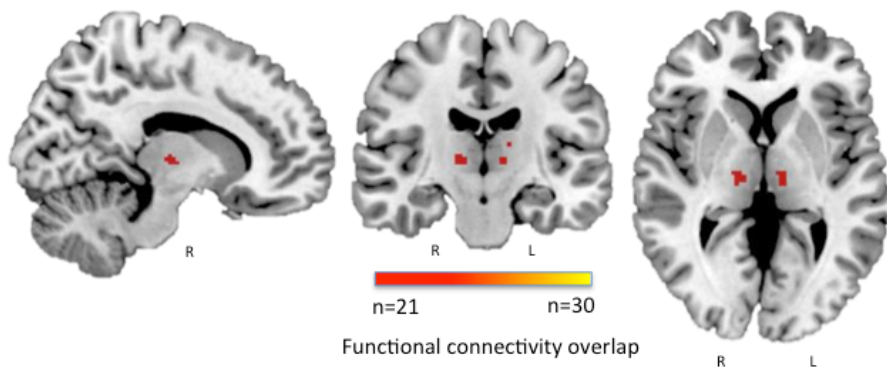

Figure e-2: Investigation into the three cases of hemichorea-hemiballismus without connectivity to our site of maximum overlap.

For each case, we show the original published image (left), a traced lesion (middle), and functional connectivity to the putamen at two thresholds, our original high threshold and a slightly lower threshold (right). Lesion #26 showed connectivity to the posterolateral putamen but to different voxels than the peak overlap of all lesions (A). Lesion # 13 was composed of two foci, the most anterior (circled in green) showed connectivity to the posterolateral putamen (B). Lesion #5, although reported as a solitary lesion, potentially had additional foci (circled in green) that were strongly connected to the posterolateral putamen (C). Images reproduced with permission from Springer Science+Business Media: Chung et al. (Hemichorea after stroke: clinical-radiological correlation. *J Neurol* 2004;251:725–729)

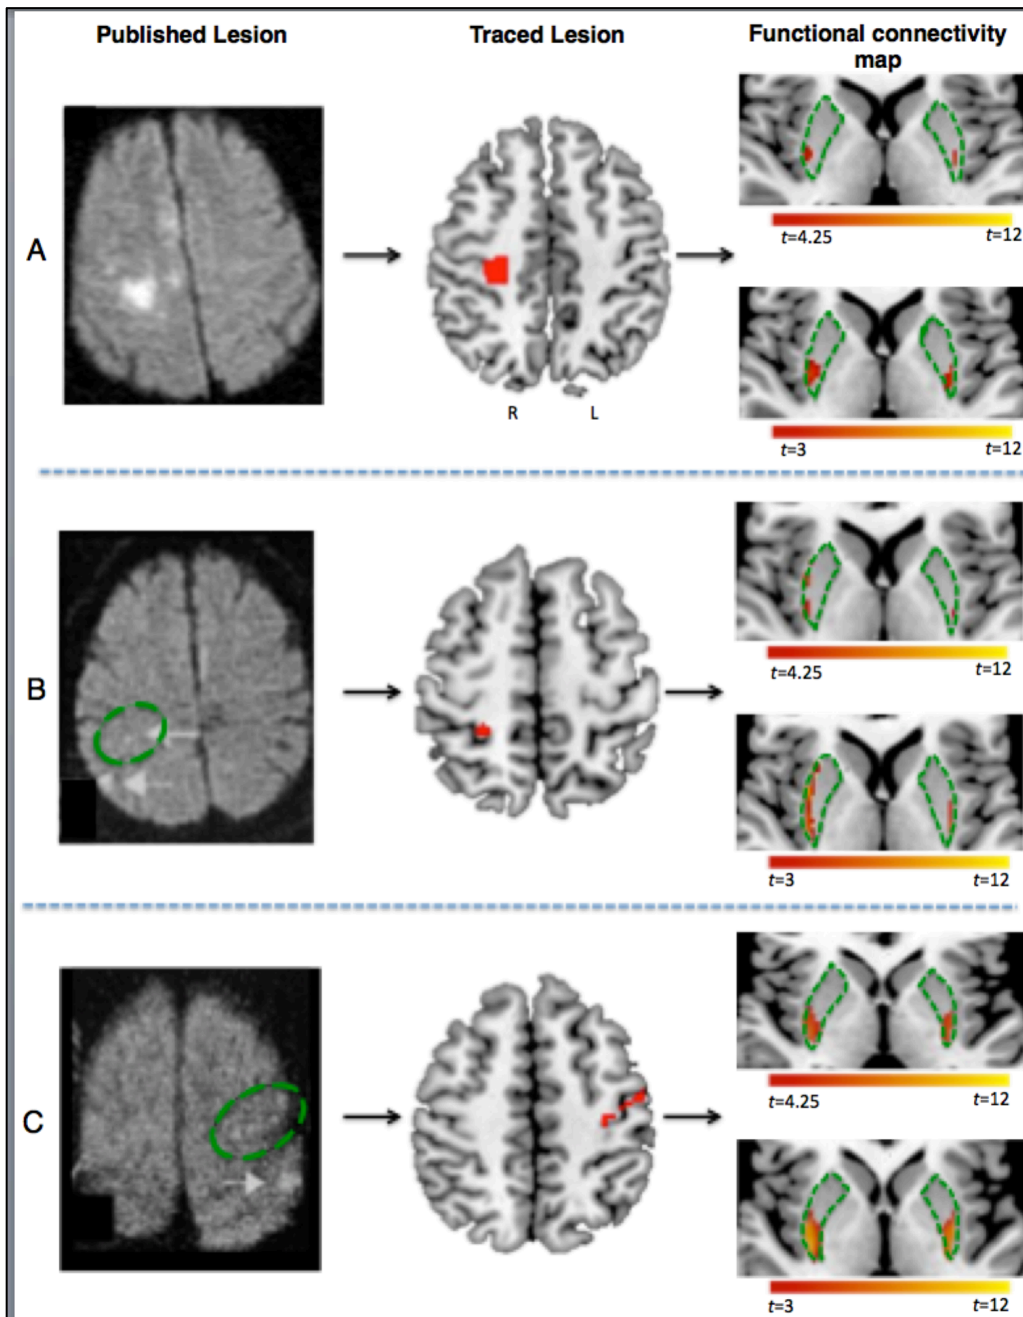

## Supplementary Tables:

Table e-1: (A) Anatomical description of 29 cases of stroke-induced hemichorea-hemiballismus.

| Lesion # | Stroke type | Primary Location              | Secondary Location | Side of symptom | Reference |
|----------|-------------|-------------------------------|--------------------|-----------------|-----------|
| 1        | ischemic    | Cortical (R insula)           |                    | Contralateral   | e1        |
| 2        | ischemic    | GPI (Right)                   |                    | Contralateral   | e2        |
| 3        | ischemic    | Cortical (R opercular)        |                    | Contralateral   | e1        |
| 4        | hemorrhagic | Putamen (Right)               | GPI (Right)        | Contralateral   | e3        |
| 5        | ischemic    | Cortical (L parietal)         |                    | Contralateral   | e1        |
| 6        | ischemic    | STN (Right)                   | R thalamic-STN     | Contralateral   | e1        |
| 7        | ischemic    | Caudate (Left)                |                    | Contralateral   | e1        |
| 8        | ischemic    | Putamen (R posterior)         |                    | Contralateral   | e1        |
| 9        | hemorrhagic | STN (Right)                   |                    | Contralateral   | e1        |
| 10       | hemorrhagic | STN (Right)                   |                    | Contralateral   | e1        |
| 11       | hemorrhagic | Caudate (Left)                |                    | Contralateral   | e1        |
| 12       | ischemic    | STN (Right)                   |                    | Contralateral   | e1        |
| 13       | ischemic    | Cortical (R parieto-temporal) |                    | Contralateral   | e1        |
| 14       | ischemic    | Cortical (L temporo-insular)  |                    | Contralateral   | e1        |
| 15       | hemorrhagic | STN (Left)                    |                    | Contralateral   | e1        |
| 16       | ischemic    | Putamen (Right)               |                    | Contralateral   | e4        |
| 17       | ischemic    | Subcortical (Right parietal)  |                    | Contralateral   | e1        |
| 18       | ischemic    | Cortical (Right parietal)     |                    | Contralateral   | e5        |

|    |          |                                  |                 |               |     |
|----|----------|----------------------------------|-----------------|---------------|-----|
| 19 | ischemic | STN (Left)                       | L thalamic- STN | Contralateral | e1  |
| 20 | ischemic | Thalamic (Left)                  |                 | Contralateral | e6  |
| 21 | ischemic | Caudate (Right)                  |                 | Contralateral | e7  |
| 22 | ischemic | Caudate (Right)                  |                 | Contralateral | e8  |
| 23 | ischemic | Putamen (Left)                   |                 | Contralateral | e9  |
| 24 | ischemic | Cortical (Right)                 | R putamen       | Contralateral | e10 |
| 25 | ischemic | Putamen (Right)                  | Caudate (Right) | Contralateral | e11 |
| 26 | ischemic | Cortical (Right parietal)        |                 | Contralateral | e12 |
| 27 | ischemic | STN (Right)                      |                 | Contralateral | e13 |
| 28 | ischemic | STN/Midbrain (Right)             | Midbrain        | Contralateral | e14 |
| 29 | ischemic | Cortical (R fronto-<br>parietal) |                 | Contralateral | e1  |

(B) Anatomical description of 10 replication cohort cases of stroke-induced hemichorea-hemiballismus.

| Lesion # | Stroke type | Primary Location          | Secondary Location              | Side of symptom | Reference              |
|----------|-------------|---------------------------|---------------------------------|-----------------|------------------------|
| 1        | ischemic    | Thalamus (right)          | GPI                             | Contralateral   | *                      |
| 2        | ischemic    | STN (left)                | Thalamus                        | Contralateral   | **                     |
| 3        | ischemic    | STN, Thalamus (left)      | Centrum semiovale (left)        | Contralateral   | Eternadifar et al. e15 |
| 4        | ischemic    | Caudate (right)           | GPe (right),<br>putamen (right) | Contralateral   | Pantano et al. e16     |
| 5        | ischemic    | STN (left)                |                                 | Ipsilateral     | Crozier et al. e17     |
| 6        | ischemic    | Centrum semiovale (right) |                                 | Contralateral   | Fukui et al. e18       |
| 7        | ischemic    | Precentral cortex (left)  |                                 | Contralateral   | Fukui et al. e18       |
| 8        | ischemic    | Centrum semiovale (right) |                                 | Contralateral   | Fukui et al. e18       |
| 9        | ischemic    | Caudate head (right)      |                                 | Contralateral   | Kirk et al. e19        |

|    |             |                        |  |               |                                            |
|----|-------------|------------------------|--|---------------|--------------------------------------------|
| 10 | hemorrhagic | Corona radiate (right) |  | Contralateral | Barinagarreemantaria et al. <sup>e20</sup> |
|----|-------------|------------------------|--|---------------|--------------------------------------------|

\* This patient was an 80 year old right handed gentleman with prior history of strokes/TIAs and cognitive impairment, nursing home resident who was sent to the ED for evaluation after developing new onset involuntary movements of his right hand. He was a poor historian and therefore the exact detailed information regarding onset was lacking on presentation. On exam by the attending neurologist, he was reported to have very prominent, athetoid-dystonic movements of his right hand that occurred involuntarily and seemed difficult to suppress. They interfered with his ability to use his hand to grasp and use objects. No hemiballismus or hemiaseterixis noted and the strength was otherwise normal in the upper extremity except for some right proximal weakness in the range of 4/5. Despite treatment with olanzapine his movements persisted for several months.

\*\* This patient was a 66yo right handed woman with a history of hypertension, hyperlipidemia, DM and graves disease, together with longstanding tobacco abuse, presented to the ED following two weeks of abnormal left sided arm and leg movements. She explained that she has been in her usual state of health, and these movements started somewhat abruptly two weeks prior. Since the onset, they did not really get worse or better. On exam, the observed movements appeared to be of a somewhat writhing variety in the left leg, together with some twisting movements. They started and stopped abruptly. The left leg was affected much more than the left arm. There was no perceptible weakness. Treatment with haloperidol led to significant improvement in the amplitude of all movements. The movements persisted for more than 12 months on follow up. Although bothersome, the small amplitude of the movement did not interfere with normal daily function.

## E-References

- e1. Chung S, Im J-H, Lee M, Kim J. Hemichorea after stroke: Clinical-radiological correlation. *J. Neurol.* 2004;251
- e2. Takahashi T, Kanamori H, Shigehara R, et al. Pure Hemi-Chorea Resulting from an Acute Phase of Contralateral Thalamic Lacunar Infarction: A Case Report. *Case Rep. Neurol.* 2012;4:194–201.
- e3. Jones HR, Baker RA, Kott HS. Hypertensive putaminal hemorrhage presenting with hemichorea. *Stroke* 1985;16(1):130–131.
- e4. Guida D, Biraschi F, Francione G, et al. Hemichorea–hemiballism syndrome following a thrombo-embolic striatal infarction. *Neurol. Sci.* 2013;34:599–601.
- e5. Pandey S, Gupta S. Lower limb monochorea from a globus pallidus infarct. *J. Clin. Neurosci.* 2014;21:1455–1457.
- e6. Wu M-C, Yen R-F, Lin C-H, Wu R-M. Mystery Case: Hemiballism in a patient with parietal lobe infarction. *Neurology* 2013;80(3):e22–e22.
- e7. Kawamura M, Takahashi N, Hirayama K. Hemichorea and its denial in a case of caudate infarction diagnosed by magnetic resonance imaging. *J. Neurol.*

- Neurosurg. Psychiatry 1988;51:590–591.
- e8. Saris S. Chorea caused by caudate infarction. *Arch. Neurol.* 1983;40:590–591.
  - e9. Galbreath AD, Goldstein LB. Dysnomia, Ataxia, Choreoathetosis, Sensory Impairment, and Gait Imbalance after Lentiform Nucleus Stroke. *J. Stroke Cerebrovasc. Dis.* 2009;18:494–496.
  - e10. Posturna RB, Lang AE. Hemiballism: revisiting a classic disorder. *Lancet Neurol.* 2003;2:661–668.
  - e11. McCollum D, Silvers S, Dawson SB, Barrett KM. Resolution of acute onset hemichorea-hemiballismus after treatment with intravenous tissue plasminogen activator. *The Neurohospitalist* 2013;3(3):131–134.
  - e12. Umeh CC, Nichols P, Rosenthal LS, Mari Z. Dual treatment of hemichorea-hemiballismus syndrome with tetrabenazine and chemodenervation. *Tremor Other Hyperkinet. Mov. (N. Y.)*. 2012;2
  - e13. Park S-Y, Kim H-J, Cho Y-J, et al. Recurrent hemichorea following a single infarction in the contralateral subthalamic nucleus. *Mov. Disord.* 2009;24(4):617–8.
  - e14. Di Lazzaro V. Repetitive transcranial magnetic stimulation of the motor cortex for hemichorea. *J. Neurol. Neurosurg. Psychiatry* 2006;77:1095–1097.
  - e15. Etemadifar M, Abtahi S-H, Abtahi S-M, et al. Hemiballismus, Hyperphagia, and Behavioral Changes following Subthalamic Infarct. *Case Rep. Med.* 2012;2012:768580.
  - e16. Pantano P, Di Cesare S, Ricci M, et al. Hemichorea after a striatal ischemic lesion: evidence of thalamic disinhibition using single-photon emission computed tomography: a case report. *Mov. Disord.* 1996;11(4):444–7.
  - e17. Crozier S, Lehericy S, Verstichel P, et al. Transient hemiballism/hemichorea due to an ipsilateral subthalamic nucleus infarction. *Neurology* 1996;46(1):267–268.
  - e18. Fukui T, Hasegawa Y, Seriyama S, et al. Hemiballism-hemichorea induced by subcortical ischemia. *Can. J. Neurol. Sci.* 1993;20(4):324–8.
  - e19. Andrew Kirk, Rutledge Harding S. Cardioembolic Caudate Infarction as a Cause of Hemichorea in Lupus Anticoagulant Syndrome. *Can. J. Neurol. Sci. / J. Can. des Sci. Neurol.* 1993;20(02):162–164.
  - e20. Barinagarrementeria F, Vega F, Del Brutto OH. Acute hemichorea due to infarction in the corona radiata. *J. Neurol.* 1989;236(6):371–372.

**e-Methods:**Methodological and processing details for the normative resting state functional connectivity MRI (rs-fcMRI) dataset

Participants completed one or more rs-fcMRI scans during which they were asked to rest in the scanner with their eyes open. Rs-fcMRI data were processed in accordance with the strategy of Fox et al. <sup>1</sup> as implemented in Van Dijk et al. <sup>2</sup>. Functional data were preprocessed to decrease image artifacts and between-slice timing differences. Data were then spatially smoothed using a Gaussian kernel of 6 mm full-width at half-maximum and temporally filtered ( $0.009 \text{ Hz} < f < 0.08 \text{ Hz}$ ). Next, several spurious or nonspecific sources of variance were removed by regression of the following variables: 1) six movement parameters computed by rigid body translation and rotation during preprocessing, 2) mean whole brain signal <sup>3 4</sup>, 3) mean brain signal within the lateral ventricles, and 4) the mean signal within a deep white matter ROI. Inclusion of the first temporal derivatives of these regressors within the linear model accounted for the time-shifted versions of spurious variance.

1. Fox MD, Snyder AZ, Vincent JL, et al. The human brain is intrinsically organized into dynamic, anticorrelated functional networks. *Proc Natl Acad Sci U S A* 2005;102(27):9673–9678.
2. Van Dijk KR, Hedden T, Venkataraman A, et al. Intrinsic functional connectivity as a tool for human connectomics: theory, properties, and optimization. *J Neurophysiol* 2010;103(1):297–321.
3. Boes AD, Prasad S, Liu H, et al. Network localization of neurological symptoms from focal brain lesions. *Brain* 2015;October(138):3061–75.
4. Fox MD, Zhang D, Snyder AZ, Raichle ME. The global signal and observed anticorrelated resting state brain networks. *J Neurophysiol* 2009;101(6):3270–3283.
